# Supplementary material
Source: publisher figshare collection journal article supplement (https://karger.figshare.com/ndownloader/files/8709214)
Supplement: Supplementary file 1 [file 8709214]

On-line Table

Children's sense of tallness correlated with SAT and measured height divided by sense of appropriate height.

| Child     |             | Child indicated that their height was not appropriate. |               | Child indicated that their height was appropriate. |            |
|-----------|-------------|--------------------------------------------------------|---------------|----------------------------------------------------|------------|
|           |             | SAT                                                    | Height SDS    | SAT                                                | Height SDS |
| Baseline  | Correlation | .109                                                   | .129          | -.089                                              | -.266      |
|           | N           | 47                                                     | 47            | 25                                                 | 27         |
| 3 months  | Correlation | .147                                                   | .150          | .016                                               | -.092      |
|           | N           | 31                                                     | 32            | 42                                                 | 44         |
| 12 months | Correlation | .063                                                   | <b>.542**</b> | -.004                                              | .178       |
|           | N           | 29                                                     | 29            | 51                                                 | 55         |
| 24 months | Correlation | .292                                                   | <b>.447**</b> | .198                                               | .136       |
|           | N           | 33                                                     | 33            | 55                                                 | 55         |

\*\* Correlation is significant at the 0.01 level (2-tailed).
